# Supplementary material for: Anti-Predation Responses to Conspecific versus Heterospecific Alarm Calls by the Nestlings of Two Sympatric Birds
Source: MDPI journal article supplement (doi:10.3390/ani12162156), 2022-08-22
Supplement: s1 [file s1]

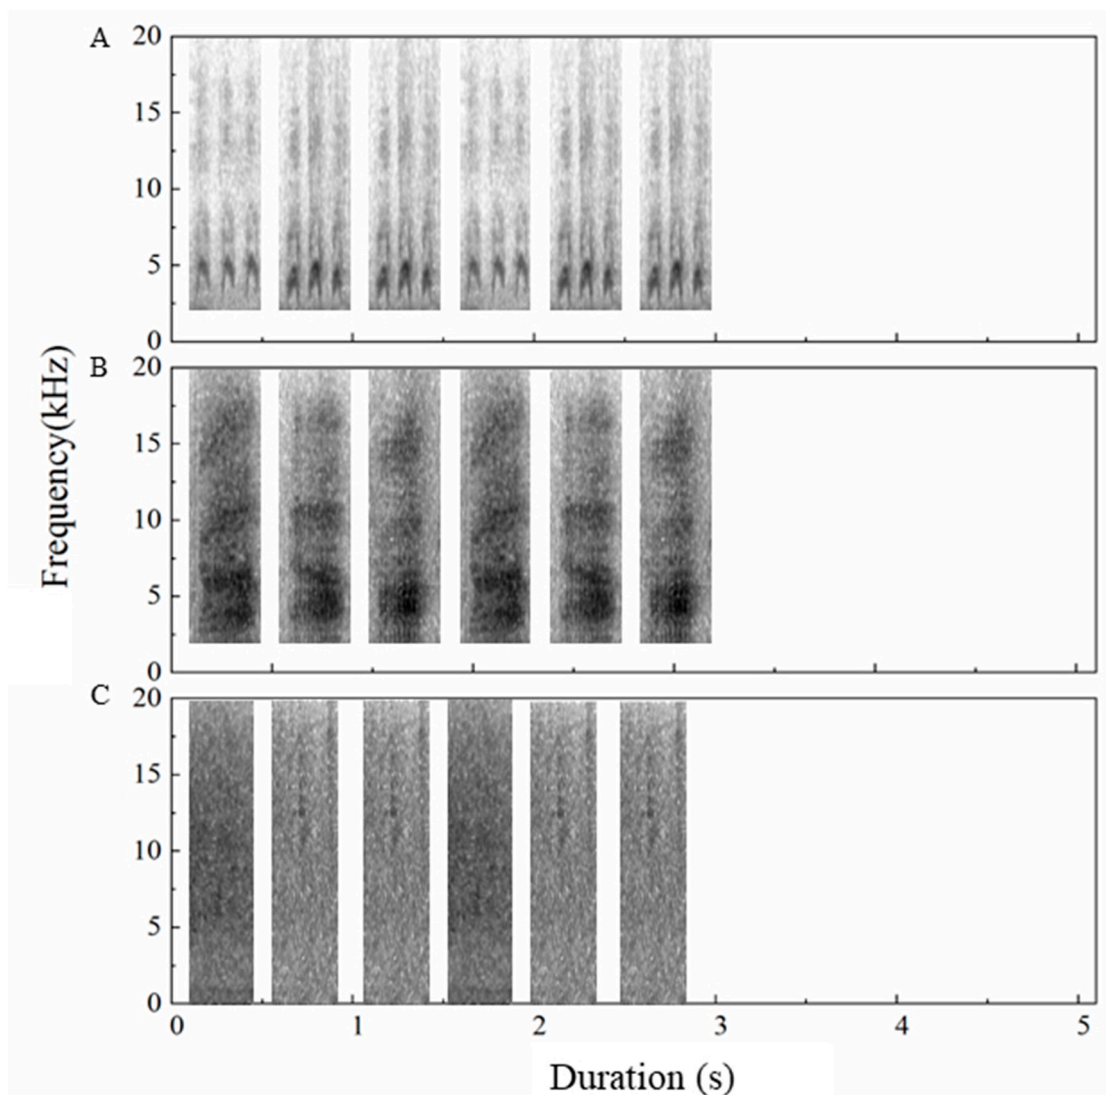

**Figure S1.** Sound spectrograms of (A) the mobbing alarm calls of vinous-throated parrotbills (VP), (B) the mobbing alarm calls of oriental reed warblers (ORW), and (C) background noise.
